# Supplementary material for: Associations of Haplotypes Upstream ofIRS1with Insulin Resistance, Type 2 Diabetes, Dyslipidemia, Preclinical Atherosclerosis, and Skeletal MuscleLOC646736mRNA Levels
Source: Hindawi journal article supplement (doi:10.1155/2015/405371), 2015-01-01
Supplement: f1 [file 405371.f1.pdf]

## ELECTRONIC SUPPLEMENTARY MATERIAL

### Supplementary Tables

**Supplementary Table 1** Prevalence of obesity, glucose intolerance and type 2 diabetes in SAPHIR participants by sex

| Glucose metabolism | Men                        |                            | Women                      |                            |
|--------------------|----------------------------|----------------------------|----------------------------|----------------------------|
|                    | BMI < 30 kg/m <sup>2</sup> | BMI ≥ 30 kg/m <sup>2</sup> | BMI < 30 kg/m <sup>2</sup> | BMI ≥ 30 kg/m <sup>2</sup> |
| Glucose tolerant   | 713 (69.4)                 | 121 (11.8)                 | 428 (68.8)                 | 88 (14.1)                  |
| Glucose intolerant | 113 (11.0)                 | 36 (3.5)                   | 58 (9.3)                   | 25 (4.0)                   |
| Diabetes           | 25 (2.4)                   | 20 (1.9)                   | 8 (1.3)                    | 15 (2.4)                   |

Results are for 1028 male and 622 female participants; percentages of all men or women in parentheses.

**Supplementary Table 2** Clinical characteristics of male and female SAPHIR participants without type 2 diabetes

| Trait                                 | Men           | Women         | <i>p</i> |
|---------------------------------------|---------------|---------------|----------|
| N                                     | 983           | 599           |          |
| Age, years                            | 49.1 (5.5)    | 56.0 (4.4)    | n.d.     |
| BMI, kg/m <sup>2</sup> <sup>1</sup>   | 26.8 (3.6)    | 26.3 (4.6)    | 0.0161   |
| BMI <sub>≥</sub> 30 kg/m <sup>2</sup> | 157 [16]      | 113 [18.9]    | n.s.     |
| Lean body mass, kg <sup>1</sup>       | 67.2 (9.2)    | 48.4 (5.9)    | <0.001   |
| Fat mass, kg <sup>1</sup>             | 17.3 (7.9)    | 21.8 (9.4)    | <0.001   |
| Body fat, % <sup>1</sup>              | 20.1 (8.0)    | 29.9 (7.9)    | <0.001   |
| VAT, cm <sup>2</sup> <sup>1</sup>     | 85.5 (44.7)   | 63.4 (42.0)   | <0.001   |
| SAT, cm <sup>2</sup> <sup>1</sup>     | 174.1 (84.0)  | 243.2 (113.4) | <0.001   |
| VAT/SAT <sup>1</sup>                  | 0.521 (0.230) | 0.282 (0.196) | <0.001   |
| Glucose, mg/dl <sup>2</sup>           | 92.5 (9.3)    | 89.0 (9.2)    | <0.001   |
| Insulin, pmol/l <sup>2</sup>          | 7.25 (4.8)    | 6.81 (3.6)    | 0.0560   |
| HOMA-IR <sup>5</sup>                  | 1.69 (1.21)   | 1.53 (0.91)   | 0.0044   |
| Cholesterol, mg/dl <sup>2,3</sup>     | 230 (39)      | 232 (40)      | n.s.     |
| HDL chol, mg/dl <sup>2,3</sup>        | 56 (13)       | 67 (16)       | <0.001   |
| LDL chol, mg/dl <sup>2,3</sup>        | 149 (36)      | 144 (37)      | 0.016    |
| Triglycerides, mg/dl <sup>2,3</sup>   | 131 (97)      | 104 (54)      | <0.001   |
| CRP, mg/l <sup>2,4</sup>              | 2.01 (2.33)   | 2.87 (2.86)   | 0.001    |

Results are numbers of observations [percentages] or average values (SD); <sup>1</sup>adjusted for age, <sup>2</sup>adjusted for age and BMI; <sup>3</sup>30 male and 52 female on lipid lowering drugs excluded. <sup>4</sup>11 males and 8 females with CRP-values >20 mg/l excluded; body composition was available in 941 male and 580 females; VAT and SAT was available in 897 male and 540 female subjects; VAT, visceral adipose tissue; SAT, subcutaneous adipose tissue; n.d., not determined.

**Supplementary Table 3** Obesity in cases with type 2 diabetes and glucose tolerant controls by sex

| Trait                           | Diabetes   |            | Controls   |           | $p^1$  | $p^2$  | $p^3$ |
|---------------------------------|------------|------------|------------|-----------|--------|--------|-------|
|                                 | Men        | Women      | Men        | Women     |        |        |       |
|                                 | (N=338)    | (N=262)    | (N=834)    | (N=516)   |        |        |       |
| BMI $\geq$ 30 kg/m <sup>2</sup> | 117 [34.6] | 107 [40.8] | 121 [14.5] | 88 [17.1] | <0.001 | 0.0477 | n.s.  |

Results are numbers of observation [percentages]; <sup>1,2,3</sup> p-values for BMI>30 kg/m<sup>2</sup>, sex and interaction between sex and BMI>30 kg/m<sup>2</sup> in logistic regression with diabetes/control as dependent variable.

**Supplementary Table 4** Clinical characteristics of SAPHIR participants with IMT measurements

| Trait                                 | Men           | Women         | <i>p</i> |
|---------------------------------------|---------------|---------------|----------|
| N                                     | 943           | 599           |          |
| Age, years                            | 49.3 (5.4)    | 56.1 (4.3)    | n.d.     |
| BMI, kg/m <sup>2</sup> <sup>1</sup>   | 27.3 (3.7)    | 26.1 (4.7)    | <0.001   |
| BMI <sub>≥</sub> 30 kg/m <sup>2</sup> | 169 [17.9]    | 122 (20.4)    | n.s.     |
| type 2 diabetes, n                    | 40 [4.2]      | 22 [3.7]      | n.s.     |
| Hypertension, n                       | 371 (39.3)    | 239 (39.9)    | n.s.     |
| Glucose intolerance, n                | 143 [15.2]    | 83 [13.9]     | n.s.     |
| Lipid lowering drugs, n               | 27 [2.9]      | 46 [7.7]      | <0.001   |
| Current smoking, n                    | 217 [23.0]    | 77 [12.9]     | 0.0000   |
| Cholesterol, mg/dl <sup>2</sup>       | 229 (40)      | 231 (40)      | n.s.     |
| HDL cholesterol, mg/dl <sup>2</sup>   | 56 (13)       | 67 (17)       | <0.001   |
| LDL cholesterol, mg/dl <sup>2</sup>   | 148 (36)      | 144 (37)      | 0.0413   |
| Triglycerides, mg/dl <sup>2</sup>     | 136 (101)     | 107 (55)      | <0.001   |
| CRP, mg/l <sup>2</sup>                | 2.51 (7.40)   | 3.48 (4.83)   | <0.001   |
| IMT carotid arteries, mm              | 0.760 (0.124) | 0.768 (0.131) | n.s.     |
| IMT carotid arteries, mm <sup>2</sup> | 0.794 (0.124) | 0.735 (0.131) | <0.001   |

Results are numbers of observations [percentages] or average values (SD); <sup>1</sup>adjusted for age, <sup>2</sup>adjusted for age and BMI; IMT, intima-media thickness of carotid arteries; n.d., not determined.

**Supplementary Table 5** Primers for SYBR Green real-time PCR

|                          |                                |
|--------------------------|--------------------------------|
| LOC646736 exon 1 forward | 5' AATGAACAAGTCCACCCCAGCG 3'   |
| LOC646736 exon 6 forward | 5' ATGCCTTGGGAGAGAGCTGTTA 3'   |
| LOC646736 exon 7 reverse | 5' GAGGTTTCATGAATTTGCTACTCA 3' |
| IRS1 forward             | 5' CCACTCGGAAAACCTTCTTCTTCAT   |
| IRS1 reverse             | 5' AGAGTCATCCACCTGCATCCA       |

**Supplementary Table 6** PCR primers for in vitro translation constructs (pT7CFE1-CHis expression vector)

|                             |                                               |
|-----------------------------|-----------------------------------------------|
| LOC646736_Ex1-3_CFE forward | 5' GAGAggatccATGTCAGTGTTGAAGGTTAC 3'<br>BamHI |
| LOC646736_Ex1-3_CFE reverse | 5' GAGActcgagGGCTTGATTAATTTCTTCCTC 3'<br>XhoI |
| LOC646736_Ex5-7_CFE forward | 5' GAGAggatccAATATGGAATGCTCACTCC 3'<br>BamHI  |
| LOC646736_Ex5-7_CFE reverse | 5' GAGActcgagCATCTTCTCCCTTCTCAG 3'<br>XhoI    |

**Supplementary Table 7** PCR primers for eGFP constructs (pEGFP-N1 expression vector)

|                             |                                                |
|-----------------------------|------------------------------------------------|
| LOC646736_Ex1-3_GFP forward | 5' GAGActcgagATGTCAGTGTTGAAGGTTAC 3'<br>XhoI   |
| LOC646736_Ex1-3_GFP reverse | 5' GAGAggatccGGCTTGATTAATTTCTTCCTC 3'<br>BamHI |
| LOC646736_Ex5-7_GFP forward | 5' GAGActcgagAATATGGAATGCTCACTCC 3'<br>XhoI    |
| LOC646736_Ex5-7_GFP reverse | 5' GAGAggatccCATCTTCTCCCTTCTCAG 3'<br>BamHI    |

**Supplementary Table 8** Clinical characteristics of subjects with skeletal muscle biopsy

| Trait                               | BMI>30 kg/m <sup>2</sup> | BMI<30 kg/m <sup>2</sup> | <i>p</i> |
|-------------------------------------|--------------------------|--------------------------|----------|
| N, m/f                              | 23/50                    | 9/10                     | n.s.     |
| Age, years                          | 38.2 (11.1)              | 46.5 (13.6)              | 0.0065   |
| BMI, kg/m <sup>2</sup> <sup>1</sup> | 44.3 (8.1)               | 24.8 (3.0)               | n.d.     |
| Glucose, mg/dl <sup>2</sup>         | 91.3 (12.1)              | 88.6 (8.4)               | n.s.     |
| Insulin, pmol/l <sup>2</sup>        | 14.9 (13.6)              | 5.3 (3.6)                | 0.0039   |
| HOMA-IR <sup>2</sup>                | 3.43 (3.14)              | 1.18 (0.90)              | 0.0031   |
| Cholesterol, mg/dl <sup>2</sup>     | 191 (36)                 | 186 (46)                 | n.s.     |
| HDL chol, mg/dl <sup>2</sup>        | 43 (17)                  | 49 (12)                  | n.s.     |
| LDL chol, mg/dl <sup>2</sup>        | 113 (34)                 | 111 (42)                 | n.s.     |
| Triglycerides, mg/dl <sup>2</sup>   | 257 (364)                | 197 (191)                | n.s.     |
| CRP, mg/l <sup>2</sup>              | 7.15 (6.39)              | 1.14 (0.91)              | <0.001   |
| <i>LOC646736</i> mRNA, AU           | 6.52 (5.84)              | 7.11 (5.42)              | n.s.     |
| <i>IRS1</i> mRNA, AU                | 14.9 (19.3)              | 14.5 (17.4)              | n.s.     |

Results are means (SD); AU, arbitrary units; <sup>1</sup>adjusted for age; <sup>2</sup>adjusted for age and sex; n.d., not determined.

**Supplementary Table 9** Genotypes in SAPHIR population

| SNP       | Sex    | Wild-type   | Heterozygous | Variant     | MAF   | $p^a$   |
|-----------|--------|-------------|--------------|-------------|-------|---------|
| rs7578326 | All    | 658 (0.398) | 752 (0.456)  | 240 (0.146) | 0.373 | 0.2732  |
|           | Male   | 417 (0.406) | 454 (0.442)  | 157 (0.153) | 0.374 | 0.0633  |
|           | Female | 241 (0.388) | 298 (0.479)  | 83 (0.133)  | 0.373 | 0.05446 |
| rs2943634 | All    | 642 (0.389) | 768 (0.466)  | 240 (0.146) | 0.378 | 0.6452  |
|           | Male   | 401 (0.390) | 468 (0.455)  | 159 (0.155) | 0.382 | 0.2279  |
|           | Female | 241 (0.388) | 300 (0.482)  | 81 (0.130)  | 0.371 | 0.4108  |
| rs2943641 | All    | 681 (0.413) | 748 (0.453)  | 221 (0.134) | 0.357 | 0.4650  |
|           | Male   | 430 (0.418) | 453 (0.441)  | 145 (0.141) | 0.361 | 0.1322  |
|           | Female | 251 (0.404) | 295 (0.474)  | 76 (0.122)  | 0.359 | 0.4529  |
| rs2713538 | All    | 477 (0.289) | 829 (0.502)  | 344 (0.209) | 0.460 | 0.6578  |
|           | Male   | 307 (0.299) | 497 (0.484)  | 224 (0.218) | 0.460 | 0.3771  |
|           | Female | 170 (0.273) | 332 (0.534)  | 120 (0.193) | 0.460 | 0.0633  |

Numbers represent counts (frequencies); MAF, minor allele frequency; <sup>a</sup>deviation from Hardy-Weinberg equilibrium.

**Supplementary Table 10** Standardized pairwise linkage disequilibrium coefficients ( $D'$ ) and  $r^2$  values of SNPs

|           | rs7578326 | rs2943634 | rs2943641 | rs2713538 |
|-----------|-----------|-----------|-----------|-----------|
| rs7578326 | -         | 0.92      | 0.80      | -0.75     |
| rs2943634 | 0.796     | -         | 0.89      | -0.89     |
| rs2943641 | 0.617     | 0.737     | -         | -0.92     |
| rs2713538 | 0.293     | 0.384     | 0.431     | -         |

SNPs were determined in 1650 participants of the SAPHIR study.  $D'$ , upper right and  $r^2$  lower left.



**Supplementary Table 11** Clinical characteristics of male SAPHIR participants without diabetes mellitus by haplotypes

| Trait                    | Haplotypes                        |                      |                         |                                   |                      |                                   | <i>p</i> <sup>a</sup> |
|--------------------------|-----------------------------------|----------------------|-------------------------|-----------------------------------|----------------------|-----------------------------------|-----------------------|
|                          | 1111                              | 1112                 | 1121                    | 1221                              | 2112                 | 2221                              |                       |
| Frequencies              | 0.167                             | 0.394                | 0.029                   | 0.015                             | 0.030                | 0.325                             |                       |
| Age (years)              | 24.4 (23.9-24.9)                  | 24.8 (24.5-25.1)     | 23.8 (22.4-25.3)        | 24.9 (22.6-27.2)                  | 24.1 (22.7-25.5)     | 24.4 (24.1-24.8)                  | NS                    |
| BMI (kg/m <sup>2</sup> ) | 10.7 (9.6-11.8)                   | 10.9 (9.9-12.0)      | 10.6 (9.2-12.1)         | 11.8 (10.2-13.4)                  | 11.1 (9.8-12.5)      | 10.9 (9.9-12.0)                   | NS                    |
| Lean body mass (kg)      | 35.2 (32.3-38.1)                  | 35.1 (32.4-37.9)     | 34.2 (30.5-38.0)        | 36.9 (32.2-41.6)                  | 36.5 (32.9-40.2)     | 34.8 (32.1-37.6)                  | NS                    |
| Fat mass (kg)            | 3.0 (0.6-5.4)                     | 3.4 (1.0-5.8)        | 3.4 (-0.2-7.0)          | 3.6 (0.2-7.0)                     | 2.5 (-0.3-5.4)       | 3.6 (1.3-6.0)                     | NS                    |
| Body fat (%)             | 4.7 (1.5-6.4)                     | 4.4 (2.1-6.9)        | 4.9 (1.3-8.5)           | 3.7 (0.1-7.3)                     | 2.9 (0.1-5.8)        | 4.8 (2.4-7.2)                     | NS                    |
| VAT (cm <sup>2</sup> )   | -14.8(-29.0- -0.49)               | -9.6 (-23.3-4.2)     | -10.3 (-28.4-7.89)      | 2.7 (-16.6-22.1)                  | -15.1 (-32.6-2.37)   | -9.6 (-23.2-3.87)                 | NS                    |
| SAT (cm <sup>2</sup> )   | 59.5 (32.3-86.7)                  | 61.25 (34.7-87.8)    | 60.3 (24.9-95.7)        | 78.9 (40.8-117.1)                 | 67.2 (34.6-99.7)     | 65.9 (40.6-91.3)                  | NS                    |
| VAT/SAT                  | 0.01 (-0.06-0.08) <sup>b</sup>    | 0.04 (-0.03-0.11)    | 0.04 (-0.05-0.13)       | 0.07 (-0.05-0.18)                 | 0.01 (-0.10- 0.10)   | 0.04 (-0.03-0.11)                 | NS                    |
| Glucose (mg/dl)          | 36.4 (33.6-39.3)                  | 36.6 (33.7-39.5)     | 35.9 (31.6-40.2)        | 37.9 (32.4-43.4)                  | 35.6 (32.0-39.1)     | 36.5 (33.8-39.3)                  | NS                    |
| Insulin (pmol/l)         | -45 (-54- -36)                    | -44 (-53- -35)       | -44 (-55- -33)          | -37(-48- -25) <sup>c</sup>        | -46 (-56- -35)       | -46 (-55- -38)                    | NS                    |
| HOMA-IR                  | -2.08 (-2.48- -1.68)              | -2.03 (-2.43- -1.64) | -2.05 (-2.53- -1.56)    | -1.69 (-2.17- -1.21) <sup>d</sup> | -2.09 (-2.54- -1.65) | -2.13 (-2.52- -1.74) <sup>b</sup> | NS                    |
| Cholesterol (mg/dl)      | 73 (59-87)                        | 73 (59-87)           | 68 (51-84)              | 81 (60-102)                       | 68 (50-85)           | 71 (57-85)                        | NS                    |
| HDL chol (mg/dl)         | 42 (37-47)                        | 41 (36-46)           | 40 (33-46)              | 44 (35-53)                        | 42 (36-48)           | 43 (38-47) <sup>b</sup>           | NS                    |
| LDL chol (mg/dl)         | 46 (33-59)                        | 46 (33-59)           | 36 (22-51) <sup>b</sup> | 52 (34-71)                        | 37 (21-53)           | 44 (31-57)                        | NS                    |
| Triglycerides (mg/dl)    | -45 (-82- -8)                     | -39 (-75- -2)        | -30 (-69-10)            | -63 (-145-18)                     | -32 (-77-13)         | -46 (-84- -8)                     | NS                    |
| CRP (mg/l)               | -1.51 (-2.44- -0.57) <sup>c</sup> | -1.24 (-2.10- -0.37) | -1.03 (-2.09- 0.04)     | -0.88 (-2.12- 0.37)               | -1.59 (-2.67- -0.53) | -1.48 (-2.37- -0.58) <sup>b</sup> | 0.0164                |

Results represent expected means (95% CI) of untransformed data; for haplotype designation, 1 or 2 refers to the major or minor alleles, respectively, in the following order: rs7578326, rs2943634, rs2943641, rs2713538;<sup>a</sup>*p*-values for global haplotype effect; N= 983, N=953 for lipids (subjects using lipid lowering drugs were excluded), N=941 for body composition, N=897 for VAT and SAT and N= 972 for CRP (subjects with values >20 mg/l excluded); <sup>b</sup>*P*<0.05, <sup>c</sup>*P*<0.02, <sup>d</sup>*P*<0.01; body composition or metabolic variables were adjusted for age or age and BMI, respectively; VAT, visceral adipose tissue; SAT, subcutaneous adipose tissue; NS, not significant.

**Supplementary Table 12 . Clinical characteristics of female SAPHIR participants without diabetes mellitus by haplotypes**

| Trait                    | Haplotypes           |                      |                      |                     |                      |                      | <i>p</i> <sup>a</sup> |
|--------------------------|----------------------|----------------------|----------------------|---------------------|----------------------|----------------------|-----------------------|
|                          | 1111                 | 1112                 | 1121                 | 1221                | 2112                 | 2221                 |                       |
| Frequencies              | 0.171                | 0.402                | 0.031                | 0.013               | 0.032                | 0.325                |                       |
| Age (years)              | 27.6 (26.9-28.29)    | 28.1 (27.8-28.5)     | 27.5 (25.7-29.3)     | 28.9 (26.9-30.9)    | 28.8 (27.5-30.1)     | 28.0 (27.6-28.4)     | NS                    |
| BMI (kg/m <sup>2</sup> ) | 12.1 (9.7-14.5)      | 11.9 (9.5-14.3)      | 12.2 (9.6-14.7)      | 10.5 (5.9-15.0)     | 11.3 (8.3-14.3)      | 11.8 (9.4-14.2)      | NS                    |
| Lean body mass (kg)      | 28.3 (25.8-30.9)     | 28.6 (26.1-31.1)     | 29.1 (26.3-32.0)     | 27.7 (21.7-33.8)    | 28.0 (24.3-31.7)     | 29.1 (26.6-31.5)     | NS                    |
| Fat mass (kg)            | 9.0 (4.0-14.0)       | 8.8 (3.7-13.9)       | 9.8 (4.5-15.1)       | 5.1 (-3.3-13.5)     | 7.8 (1.5-14.0)       | 8.6 (3.6-13.6)       | NS                    |
| Body fat (%)             | 10.3 (6.3-14.4)      | 10.2 (6.1-14.2)      | 10.5 (5.7-15.2)      | 7.0 (0.9-13.1)      | 9.0 (4.0-14.0)       | 9.7 (5.7-13.8)       | NS                    |
| VAT (cm <sup>2</sup> )   | -8.1 (-32.0-15.85)   | -8.4 (-32.2-15.5)    | -9.6 (-35.8-16.6)    | -24.2 (-65.6-17.2)  | -11.0 (-40.4-18.4)   | -4.3 (-28.3-19.6)    | NS                    |
| SAT (cm <sup>2</sup> )   | 60.4 (-1.7-122.4)    | 52.4 (-9.4-114.3)    | 83.2 (16.9-149.6)    | 50.4 (43.2-143.9)   | 44.3 (-30.1-118.7)   | 51.8 (-10.9-114.3)   | NS                    |
| VAT/SAT                  | 0.07 (-0.05-0.18)    | 0.09 (-0.04-0.21)    | 0.03 (-0.14-0.20)    | 0.01 (-0.25-0.26)   | 0.08 (-0.06- 0.22)   | 0.09 (-0.02-0.21)    | NS                    |
| Glucose (mg/dl)          | 27.3 (19.9-34.7)     | 28.1 (20.9-35.3)     | 28.3 (18.5-38.0)     | 29.7 (18.7-40.6)    | 25.0 (18.9-31.1)     | 28.2 (20.1-36.3)     | NS                    |
| Insulin (pmol/l)         | -16 (-37- -6)        | -15 (-25- -4)        | -16 (-28- -3)        | -16(-31- -0)        | -15 (-27- -3)        | -17 (-27- -7)        | NS                    |
| HOMA-IR                  | -0.84 (-1.31- -0.37) | -0.80 (-1.26- -0.33) | -0.86 (-1.40- -0.32) | -79 (-1.44- -0.14)  | -0.83 (-1.38- -0.28) | -0.90 (-1.37- -0.44) | NS                    |
| Cholesterol (mg/dl)      | 92 (67-117)          | 91 (66-116)          | 85 (56-114)          | 95 (65-124)         | 91 (58-123)          | 91 (65-117)          | NS                    |
| HDL chol (mg/dl)         | 44 (35-54)           | 45 (36-55)           | 43 (33-54)           | 44 (32-55)          | 45 (33-57)           | 45 (36-55)           | NS                    |
| LDL chol (mg/dl)         | 50 (27-74)           | 48 (24-71)           | 44 (15-73)           | 49 (23-76)          | 49 (18-79)           | 49 (25-72)           | NS                    |
| Triglycerides (mg/dl)    | -1 (-32-30)          | 0 (-32- 32)          | -6 (-43-30)          | 12 (-26-52)         | -14 (-59-31)         | -4 (-36-29)          | NS                    |
| CRP mg/l)                | -2.59 (-4.31- -0.88) | -2.51 (-4.27- -0.76) | -2.93 (-5.02- -0.84) | -3.10 (-6.69- 0.50) | -2.18 (-4.18- -0.18) | -2.54 (-4.27- -0.81) | NS                    |

Results represent expected means (95% CI) of untransformed data; for haplotype designation, 1 or 2 refers to the major or minor alleles, respectively, in the following order: rs7578326, rs2943634, rs2943641, rs2713538; <sup>a</sup>*p*-values for global haplotype effect; N= 599, N=547 for lipids (subjects using lipid lowering drugs were excluded), N=580 for body composition, N=540 for VAT and SAT and N=591 for CRP (subjects with values>20 mg/L excluded); body composition or metabolic variables were adjusted for age or age and BMI, respectively; VAT, visceral adipose tissue; SAT, subcutaneous adipose tissue; NS, not significant.

**Supplementary Table 13** Polymorphisms and associated risk of type 2 diabetes mellitus

| SNP       | Genotype | Cases |        | Controls |       | <i>p</i> <sup>a</sup> | Odds Ratio (95% CI) |                                    |
|-----------|----------|-------|--------|----------|-------|-----------------------|---------------------|------------------------------------|
|           |          | N     | %      | N        | %     |                       | Univariate Analysis | Multivariate Analysis <sup>b</sup> |
| rs7578326 | AA       | 252   | 0.4203 | 518      | 0.384 | 0.02758               | 1.00                | 1.00                               |
|           | AG       | 282   | 0.470  | 624      | 0.462 |                       | 0.93 (0.76-1.14)    | 0.93 (0.75-1.16)                   |
|           | GG       | 66    | 0.110  | 208      | 0.154 |                       | 0.65 (0.48-0.89)    | 0.61 (0.44-0.85)                   |
| rs2943634 | CC       | 265   | 0.442  | 544      | 0.403 | 0.0293                | 1.00                | 1.00                               |
|           | CA       | 275   | 0.458  | 615      | 0.456 |                       | 0.92 (0.75-1.13)    | 0.94 (0.75-1.16)                   |
|           | AA       | 60    | 0.100  | 191      | 0.142 |                       | 0.64 (0.47-0.89)    | 0.60 (0.42-0.84)                   |
| rs2943641 | CC       | 251   | 0.418  | 509      | 0.377 | 0.0190                | 1.00                | 1.00                               |
|           | CT       | 283   | 0.472  | 631      | 0.467 |                       | 0.91 (0.74-1.12)    | 0.92 (0.74-1.14)                   |
|           | TT       | 66    | 0.110  | 210      | 0.156 |                       | 0.64 (0.47-0.87)    | 0.59 (0.42-0.84)                   |
| rs2713538 | AA       | 152   | 0.253  | 398      | 0.295 | 0.0630                | 1.00                | 1.00                               |
|           | AG       | 307   | 0.512  | 687      | 0.509 |                       | 1.17 (0.92-1.47)    | 1.24 (0.97-1.59)                   |
|           | GG       | 141   | 0.235  | 265      | 0.196 |                       | 1.39 (1.05-1.84)    | 1.48 (1.10-1.88)                   |

<sup>a</sup> $\chi^2$  analysis; <sup>b</sup>logistic regression analysis adjusted for age, sex and BMI.

**Supplementary Table 14** Haplotypes and associated risk of type 2 diabetes mellitus in men

| Haplotype | Frequencies (%)     |                  | Odds Ratio (95% CI)           |                                       |
|-----------|---------------------|------------------|-------------------------------|---------------------------------------|
|           | Controls<br>(N=834) | Cases<br>(N=338) | Univariate Analysis           | Multivariate<br>Analysis <sup>a</sup> |
| 1111      | 0.166               | 0.162            | 0.85 (0.66-1.10)              | 0.84 (0.64-1.10)                      |
| 1112      | 0.395               | 0.453            | 1.00                          | 1.00                                  |
| 1121      | 0.030               | 0.028            | 0.81 (0.45-1.45)              | 0.82 (0.45-1.50)                      |
| 1221      | 0.015               | 0.011            | 0.60 (0.25-1.44)              | 0.71 (0.30-1.67)                      |
| 2112      | 0.030               | 0.025            | 0.73 (0.41-1.32)              | 0.80 (0.44-1.44)                      |
| 2221      | 0.325               | 0.274            | 0.74 (0.59-0.92) <sup>b</sup> | 0.76 (0.60-0.95) <sup>c</sup>         |

For haplotype designation, 1 or 2 refers to the major or minor alleles, respectively, in the following order: rs7578326, rs2943634, rs2943641, rs2713538; global haplotype effects for univariate analysis  $p=0.04854$ ; <sup>a</sup>adjusted for age and BMI; <sup>b</sup> $p=0.0057$ , <sup>c</sup> $p=0.0183$ .

**Supplementary Table 15** Haplotypes and associated risk of type 2 diabetes mellitus in women

| Haplotype | Frequencies (%)     |                  | Odds Ratio (95% CI) |                                       |
|-----------|---------------------|------------------|---------------------|---------------------------------------|
|           | Controls<br>(N=516) | Cases<br>(N=262) | Univariate Analysis | Multivariate<br>Analysis <sup>a</sup> |
| 1111      | 0.163               | 0.166            | 0.96 (0.70-1.32)    | 0.98 (0.69-1.38)                      |
| 1112      | 0.393               | 0.425            | 1.00                | 1.00                                  |
| 1121      | 0.031               | 0.037            | 1.10 (0.61-2.01)    | 1.13 (0.62-2.08)                      |
| 1221      | 0.012               | 0.012            | 0.93 (0.33-2.58)    | 1.09 (0.31-3.84)                      |
| 2112      | 0.028               | 0.026            | 0.88 (0.44-1.76)    | 0.98 (0.47-2.03)                      |
| 2221      | 0.333               | 0.306            | 0.87 (0.68-1.12)    | 0.81 (0.62-1.06) <sup>b</sup>         |

For haplotype designation, 1 or 2 refers to the major or minor alleles, respectively, in the following order: rs7578326, rs2943634, rs2943641, rs2713538; global haplotype effects for univariate and multivariate analyses not significant; <sup>a</sup>adjusted for age and BMI; <sup>b</sup> $p=0.1354$ .

**Supplementary Table 16** Haplotypes and intima-media thickness of common carotid arteries in men

| Haplotype | Frequencies (%) | IMT (mm)             | <i>p</i>  |
|-----------|-----------------|----------------------|-----------|
| 1111      | 0.164           | 0.046 (0.001-0.090)  | n.s.      |
| 1112      | 0.400           | 0.047 (0.001-0.094)  | reference |
| 1121      | 0.028           | 0.049 (0.001-0.102)  | n.s.      |
| 1221      | 0.013           | 0.023 (0.051-0.097)  | n.s.      |
| 2112      | 0.029           | 0.076 (0.023-0.128)  | n.s.      |
| 2221      | 0.324           | 0.036 (-0.010-0.083) | 0.0427    |

For haplotype designation, 1 or 2 refers to the major or minor alleles, respectively, in the following order: rs7578326, rs2943634, rs2943641, rs2713538; N=943; data are expected means (SD) of average IMTs of common carotid arteries, adjusted for age, BMI, hypertension status, smoking status, use of lipid lowering drugs, LDL cholesterol and CRP; global haplotype effect n.s.; IMT, intima-media thickness; NS, not significant.

**Supplementary Table 17.** Haplotypes and intima-media thickness of common carotid arteries in women

| Haplotype | Frequencies (%) | IMT (mm)             | <i>p</i>  |
|-----------|-----------------|----------------------|-----------|
| 1111      | 0.171           | 0.101 (0.022-0.179)  | n.s.      |
| 1112      | 0.403           | 0.115 (0.036-0.194)  | reference |
| 1121      | 0.028           | 0.131 (0.044-0.218)  | n.s.      |
| 1221      | 0.015           | 0.149 (0.039-0.259)  | n.s.      |
| 2112      | 0.026           | 0.074 (-0.015-0.163) | n.s.      |
| 2221      | 0.317           | 0.103 (0.025-0.181)  | n.s.      |

For haplotype designation, 1 or 2 refers to the major or minor alleles, respectively, in the following order: rs7578326, rs2943634, rs2943641, rs2713538; N=599; data are expected means (SD) of average IMTs of common carotid arteries, adjusted for age, BMI, hypertension status, smoking status, menopausal status, use of lipid lowering drugs, LDL cholesterol and CRP; global haplotype effect NS; IMT, intima-media thickness; NS, not significant.
